# Supplementary material for: Fullerenol nanoparticles as a new delivery system for doxorubicin
Source: Royal Society of Chemistry journal article supplement (doi:10.1039/c6ra03879d), 2016-01-01
Supplement: c6ra03879d1.pdf [file c6ra03879d1.pdf]

S1

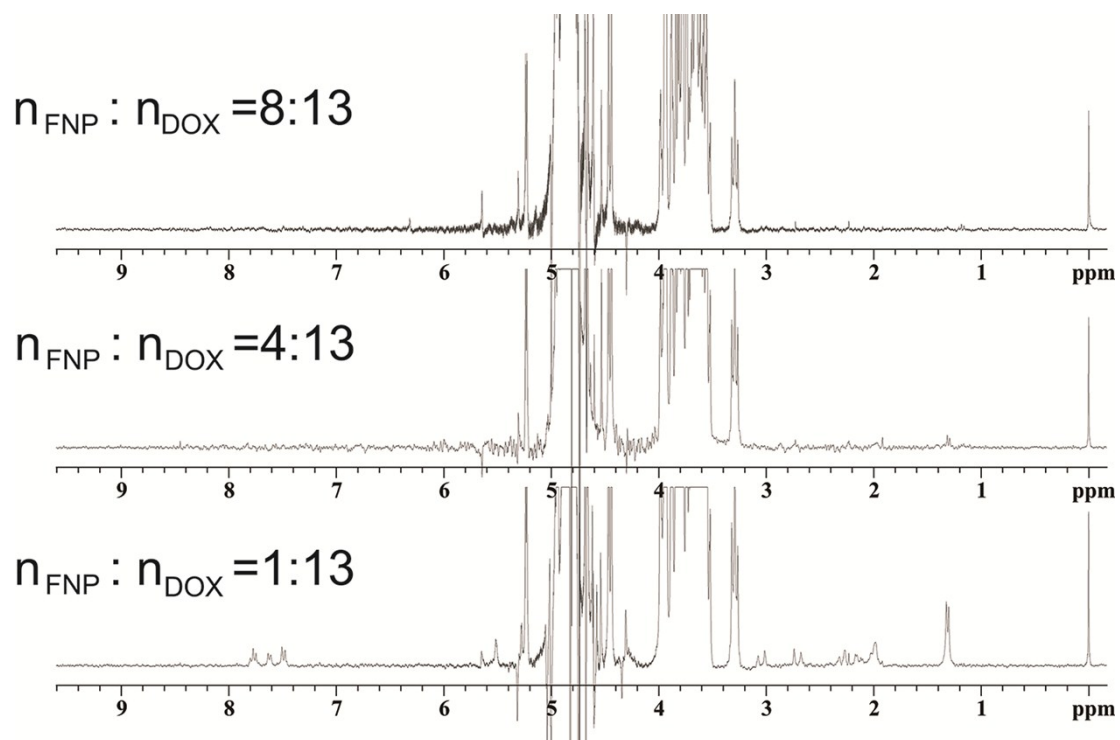

Figure S1.  $^1\text{H}$  NMR spectra of FNP/DOX nanocomposite. The effect of different molar ratio of FNP and DOX on the chemical shift of the aromatic protons and methyl group of doxorubicin

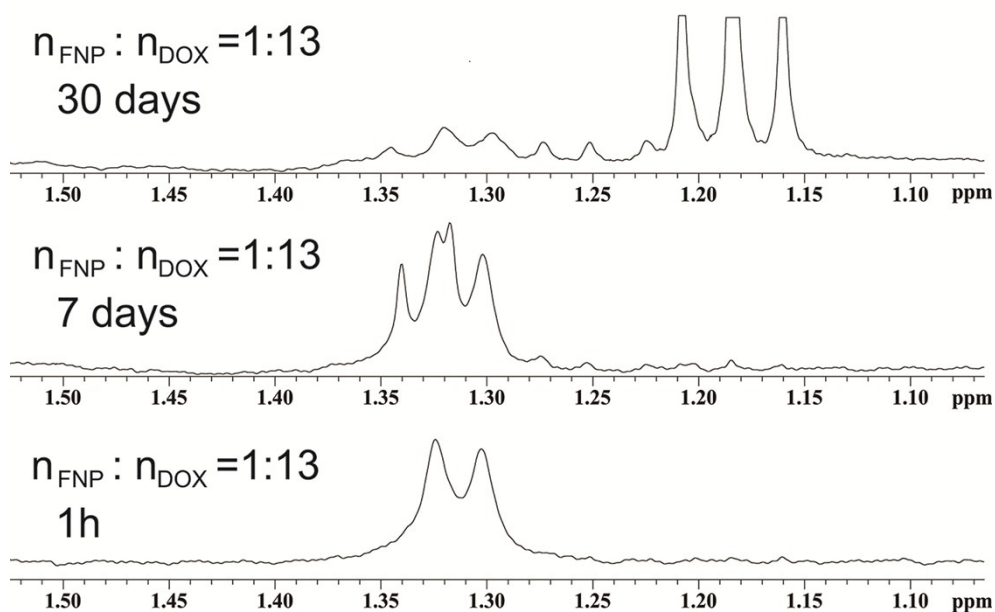

Figure S2.  $^1\text{H}$  NMR spectra of FNP/DOX nanocomposite. Chemical shift of methyl group at molar ratio  $n_{\text{FNP}} : n_{\text{DOX}} = 1 : 13$  after 30 days, after seven days, and after 1 h of preparation

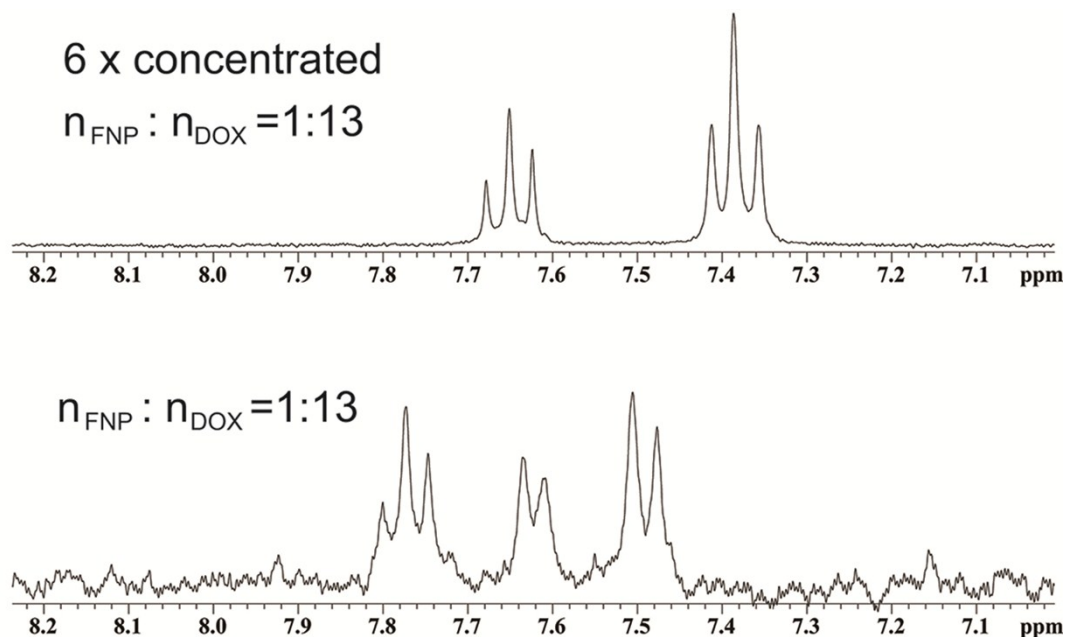

Figure S3.  $^1\text{H}$  NMR spectra of FNP/DOX nanocomposite. Chemical shift of aromatic protons in the nanocomposite of molar ratio  $n_{\text{FNP}} : n_{\text{DOX}} = 1 : 13$  in concentrated sample (1 : 6), and unconcentrated sample

S3

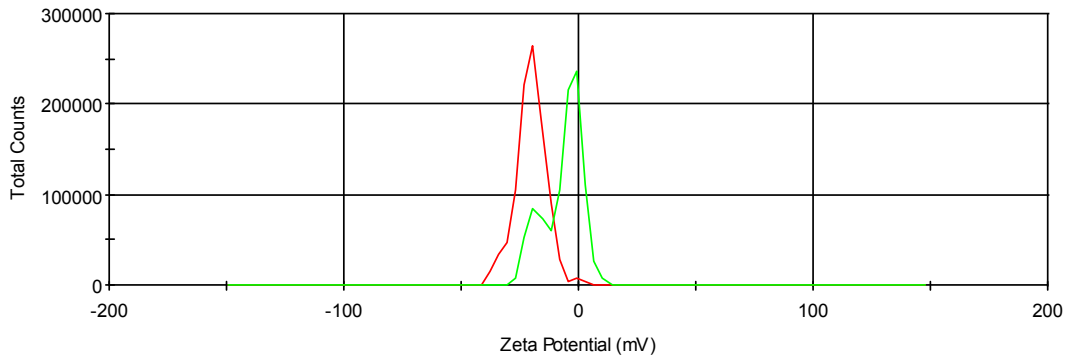

Figure S4.  $\zeta$  potential of FNP and FNP/DOX in aqueous solutions after 48 h. Red line refers to FNP and green line refers to FNP/DOX. Three independent measurements were performed and one representative is displayed. Measurements were done by Zetasizer Nano based on method of dynamic light scattering.

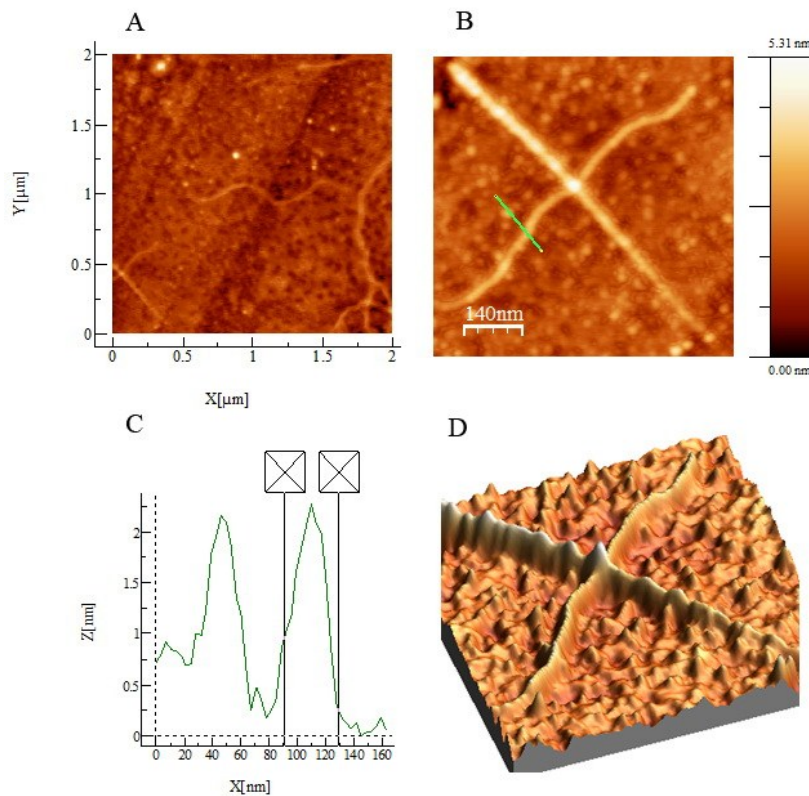

Figure S5. AFM measurement of FNP/DOX nanocomposite, on HOPG surface, after 30-day storage in dark at 22 °C a) scale 2000 x 2000 nm<sup>2</sup> b) scale 670 x 670 nm<sup>2</sup> c) corresponding cross-section d) 3D image

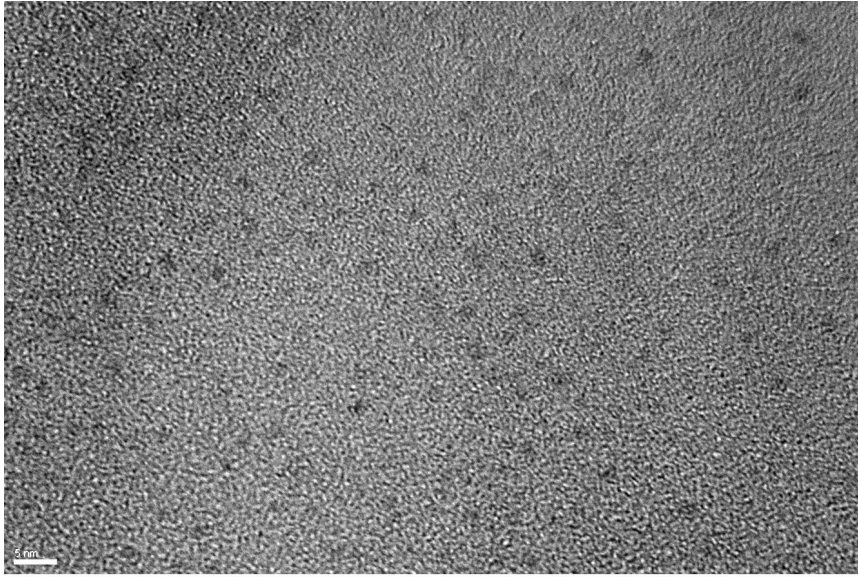

Figure S6. TEM measurement of aqueous solution of FNP immediately after sonication. The size of FNP nanoparticles is around 2 nm. Measurements were performed on copper grid 300 mesh.

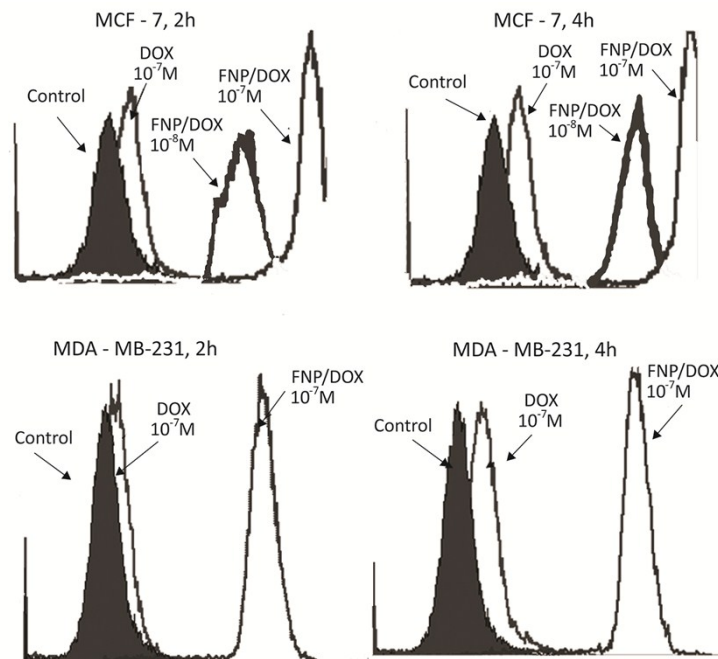

Figure S7. Uptake of DOX and FNP/DOX by human breast cancer cells (MCF-7, ER<sup>+</sup>; MDA-MB-231, ER<sup>-</sup>). Control cells and cells treated with DOX and FNP/DOX were incubated at 37 °C for 2 and 4 hours. Fluorescent data were achieved using flow cytometry analysis. Results are presented as overlaid histograms of one representative experiment from three independent experiments with similar results.

Table S1. Distribution of MCF-7 cells between the cell cycle phases (%) in regard to treatments in four different time points

| Control |     | G0G1  | S     | G2M   | subG1 |
|---------|-----|-------|-------|-------|-------|
|         | 2h  | 54.63 | 26.32 | 17.69 | 2.01  |
|         | 4h  | nr    | nr    | nr    | nr    |
|         | 24h | 65.19 | 17.29 | 15.39 | 2.93  |
|         | 48h | 69.93 | 17.27 | 11.69 | 1.97  |

| FNP |     | G0G1  | S     | G2M  | subG1 |
|-----|-----|-------|-------|------|-------|
|     | 2h  | nr    | nr    | nr   | nr    |
|     | 4h  | nr    | nr    | nr   | nr    |
|     | 24h | 69.09 | 18.46 | 9.19 | 4.34  |
|     | 48h | 62.44 | 29.35 | 8.57 | 0.60  |

| DOX |     | G0G1  | S     | G2M   | subG1 |
|-----|-----|-------|-------|-------|-------|
|     | 2h  | 54.19 | 24.05 | 20.37 | 1.27  |
|     | 4h  | 51.66 | 25.74 | 20.25 | 3.57  |
|     | 24h | 18.78 | 6.83  | 73.26 | 1.71  |
|     | 48h | 63.25 | 13.65 | 21.46 | 2.34  |

| FNP/DOX<br>0.1 $\mu$ M |     | G0G1  | S     | G2M   | subG1 |
|------------------------|-----|-------|-------|-------|-------|
|                        | 2h  | 50.77 | 28.48 | 18.87 | 2.88  |
|                        | 4h  | 45.56 | 35.75 | 14.41 | 5.62  |
|                        | 24h | 53.32 | 24.96 | 15.03 | 7.70  |
|                        | 48h | 53.67 | 34.84 | 8.88  | 3.35  |

| FNP/DOX<br>0.01 $\mu$ M |     | G0G1  | S     | G2M   | subG1 |
|-------------------------|-----|-------|-------|-------|-------|
|                         | 2h  | 53.97 | 25.43 | 19.00 | 2.91  |
|                         | 4h  | 53.39 | 24.76 | 18.93 | 6.68  |
|                         | 24h | 61.88 | 21.26 | 15.52 | 2.11  |
|                         | 48h | 50.90 | 35.76 | 6.41  | 8.27  |

Results present one representative experiment from three independent experiments with similar results. nr means that data were not recorded at specified time points.

Table S2. Distribution of MDA-MB-231 cells between the cell cycle phases (%) in regard to treatments in four different time points

| Control |     | G0G1  | S     | G2M  | subG1 |
|---------|-----|-------|-------|------|-------|
|         | 2h  | nr    | nr    | nr   | nr    |
|         | 4h  | nr    | nr    | nr   | nr    |
|         | 24h | 53.65 | 34.64 | 9.84 | 1.23  |
|         | 48h | nr    | nr    | nr   | nr    |

| FNP |     | G0G1  | S     | G2M   | subG1 |
|-----|-----|-------|-------|-------|-------|
|     | 2h  | nr    | nr    | nr    | nr    |
|     | 4h  | nr    | nr    | nr    | nr    |
|     | 24h | 56.96 | 30.95 | 11.12 | 1.62  |
|     | 48h | 58.89 | 25.49 | 13.34 | 1.37  |

| DOX |     | G0G1  | S     | G2M   | subG1 |
|-----|-----|-------|-------|-------|-------|
|     | 2h  | 55.86 | 31.04 | 13.03 | 0.77  |
|     | 4h  | 55.77 | 32.45 | 11.49 | 0.92  |
|     | 24h | 50.71 | 28.25 | 20.5  | 1.36  |
|     | 48h | 60.15 | 26.2  | 11.43 | 1.16  |

| FNP/DOX<br>0.1 $\mu$ M |     | G0G1  | S     | G2M   | subG1 |
|------------------------|-----|-------|-------|-------|-------|
|                        | 2h  | 56.09 | 31.95 | 11.08 | 1.63  |
|                        | 4h  | 50.72 | 35.09 | 9.84  | 5.68  |
|                        | 24h | 55.84 | 32.1  | 8.58  | 4.95  |
|                        | 48h | 59.3  | 28.02 | 11.8  | 0.13  |

Results present one representative experiment from three independent experiments with similar results. nr means that data were not recorded at specified time points.

Table S3. Lethal and teratogenic effects observed in zebrafish (*Danio rerio*) embryos at different hours post fertilization (hpf).

| Category           | Developmental endpoints                       | Exposure time (hpf) |    |    |    |
|--------------------|-----------------------------------------------|---------------------|----|----|----|
|                    |                                               | 24                  | 48 | 72 | 96 |
| Lethal effect      | Egg coagulation <sup>a</sup>                  | •                   | •  | •  | •  |
|                    | No somite formation                           | •                   | •  | •  | •  |
|                    | Tail not detached                             | •                   | •  | •  | •  |
|                    | No heart-beat                                 |                     | •  | •  | •  |
| Teratogenic effect | Malformation of head                          | •                   | •  | •  | •  |
|                    | Malformation of eyes <sup>b</sup>             | •                   | •  | •  | •  |
|                    | Malformation of sacculi/otoliths <sup>c</sup> | •                   | •  | •  | •  |
|                    | Malformation of chorda                        | •                   | •  | •  | •  |
|                    | Malformation of tail <sup>d</sup>             | •                   | •  | •  | •  |
|                    | Scoliosis                                     | •                   | •  | •  | •  |
|                    | Heart beat frequency                          |                     | •  | •  | •  |
|                    | Blood circulation                             |                     | •  | •  | •  |
|                    | Pericardial edema                             | •                   | •  | •  | •  |
|                    | Yolk edema                                    | •                   | •  | •  | •  |
|                    | Yolk deformation                              | •                   | •  | •  | •  |
|                    | Growth retardation <sup>e</sup>               | •                   | •  | •  | •  |

<sup>a</sup> No clear organs structure are recognized

<sup>b</sup> Malformation of eyes was recorded for the retardation in eye development and abnormality in shape and size.

<sup>c</sup> Presence of no, one or more than two otoliths per sacculus, as well as reduction and enlargement of otoliths and/or sacculi (otic vesicles).

<sup>d</sup> Tail malformation was recorded when the tail was bent, twisted or shorter than to control embryos as assessed by optical comparison.

<sup>e</sup> Growth retardation was recorded by comparing with the control embryos in development or size (before hatching, at 24 hpf and 48 hpf) or in a body length (after hatching, at and onwards 72 hpf) using by optical comparison using a inverted microscope (CKX41; Olympus, Tokyo, Japan).

Table S4. Effect percentages for abnormal morphological characteristics evaluated in the zebrafish toxicity assay after 96 h exposure to fullereneol (FNP).

| FNP           | Lethal embryos <sup>a</sup> | Teratogenic embryos <sup>a</sup> | Normal embryos <sup>a</sup> | Growth retardation <sup>b</sup> | Notochord <sup>b</sup> | Eyes <sup>b</sup> | Otoliths <sup>b</sup> | Somites <sup>b</sup> | Tail detachment <sup>b</sup> | Heart beat <sup>b</sup> | Pericardial edema <sup>b</sup> | Blood circulation <sup>b</sup> | Yolk edema <sup>b</sup> | Hatched <sup>b</sup> | Head deformity <sup>c</sup> | Skeletal deformities <sup>c</sup> | Jaw deformity <sup>c</sup> | Tail deformity <sup>c</sup> |
|---------------|-----------------------------|----------------------------------|-----------------------------|---------------------------------|------------------------|-------------------|-----------------------|----------------------|------------------------------|-------------------------|--------------------------------|--------------------------------|-------------------------|----------------------|-----------------------------|-----------------------------------|----------------------------|-----------------------------|
| <b>24 hpf</b> |                             |                                  |                             |                                 |                        |                   |                       |                      |                              |                         |                                |                                |                         |                      |                             |                                   |                            |                             |
| 92 µM         | 1.11                        | 0.00                             | 98.89                       | 0.00                            | 0.00                   | 0.00              | 0.00                  | 0.00                 | 0.00                         | 0.00                    | -                              | -                              | -                       | -                    | -                           | -                                 | -                          | -                           |
| 46 µM         | 0.00                        | 0.00                             | 100.00                      | 0.00                            | 0.00                   | 0.00              | 0.00                  | 0.00                 | 0.00                         | 0.00                    | -                              | -                              | -                       | -                    | -                           | -                                 | -                          | -                           |
| 9.2 µM        | 0.00                        | 0.00                             | 100.00                      | 0.00                            | 0.00                   | 0.00              | 0.00                  | 0.00                 | 0.00                         | 0.00                    | -                              | -                              | -                       | -                    | -                           | -                                 | -                          | -                           |
| 4.6 µM        | 0.00                        | 0.00                             | 100.00                      | 0.00                            | 0.00                   | 0.00              | 0.00                  | 0.00                 | 0.00                         | 0.00                    | -                              | -                              | -                       | -                    | -                           | -                                 | -                          | -                           |
| <b>48 hpf</b> |                             |                                  |                             |                                 |                        |                   |                       |                      |                              |                         |                                |                                |                         |                      |                             |                                   |                            |                             |
| 92 µM         | 2.22                        | 0.00                             | 97.78                       | 0.00                            | 0.00                   | 0.00              | 0.00                  | 0.00                 | 0.00                         | 95.56                   | 0.00                           | 0.00                           | 0.00                    | -                    | -                           | -                                 | -                          | -                           |
| 46 µM         | 0.00                        | 0.00                             | 100.00                      | 0.00                            | 0.00                   | 0.00              | 0.00                  | 0.00                 | 0.00                         | 89.56                   | 0.00                           | 0.00                           | 0.00                    | -                    | -                           | -                                 | -                          | -                           |
| 9.2 µM        | 0.00                        | 0.00                             | 100.00                      | 0.00                            | 0.00                   | 0.00              | 0.00                  | 0.00                 | 0.00                         | 0.00                    | 0.00                           | 0.00                           | 0.00                    | -                    | -                           | -                                 | -                          | -                           |
| 4.6 µM        | 0.00                        | 0.00                             | 100.00                      | 0.00                            | 0.00                   | 0.00              | 0.00                  | 0.00                 | 0.00                         | 0.00                    | 0.00                           | 0.00                           | 0.00                    | -                    | -                           | -                                 | -                          | -                           |
| <b>72 hpf</b> |                             |                                  |                             |                                 |                        |                   |                       |                      |                              |                         |                                |                                |                         |                      |                             |                                   |                            |                             |
| 92 µM         | 4.44                        | 6.67                             | 88.89                       | 0.00                            | 0.00                   | 0.00              | 0.00                  | 0.00                 | -                            | 100.00                  | 3.49                           | 0.00                           | 0.00                    | 100.00               | 0.00                        | 6.98                              | 0.00                       | 0.00                        |
| 46 µM         | 0.00                        | 0.00                             | 100.00                      | 0.00                            | 0.00                   | 0.00              | 0.00                  | 0.00                 | -                            | 100.00                  | 0.00                           | 0.00                           | 0.00                    | 100.00               | 0.00                        | 0.00                              | 0.00                       | 0.00                        |
| 9.2 µM        | 0.00                        | 0.00                             | 100.00                      | 0.00                            | 0.00                   | 0.00              | 0.00                  | 0.00                 | -                            | 0.00                    | 0.00                           | 0.00                           | 0.00                    | 100.00               | 0.00                        | 0.00                              | 0.00                       | 0.00                        |
| 4.6 µM        | 0.00                        | 0.00                             | 100.00                      | 0.00                            | 0.00                   | 0.00              | 0.00                  | 0.00                 | -                            | 0.00                    | 0.00                           | 0.00                           | 0.00                    | 100.00               | 0.00                        | 0.00                              | 0.00                       | 0.00                        |
| <b>96 hpf</b> |                             |                                  |                             |                                 |                        |                   |                       |                      |                              |                         |                                |                                |                         |                      |                             |                                   |                            |                             |
| 92 µM         | 4.44                        | 6.67                             | 88.89                       | 100.00                          | 0.00                   | 0.00              | 0.00                  | 0.00                 | -                            | 100.00                  | 3.49                           | 0.00                           | 0.00                    | 100.00               | 0.00                        | 6.98                              | 0.00                       | 0.00                        |
| 46 µM         | 0.00                        | 0.00                             | 100.00                      | 0.00                            | 0.00                   | 0.00              | 0.00                  | 0.00                 | -                            | 0.00                    | 0.00                           | 0.00                           | 0.00                    | 100.00               | 0.00                        | 0.00                              | 0.00                       | 0.00                        |
| 9.2 µM        | 0.00                        | 0.00                             | 100.00                      | 0.00                            | 0.00                   | 0.00              | 0.00                  | 0.00                 | -                            | 0.00                    | 0.00                           | 0.00                           | 0.00                    | 100.00               | 0.00                        | 0.00                              | 0.00                       | 0.00                        |
| 4.6 µM        | 0.00                        | 0.00                             | 100.00                      | 0.00                            | 0.00                   | 0.00              | 0.00                  | 0.00                 | -                            | 0.00                    | 0.00                           | 0.00                           | 0.00                    | 100.00               | 0.00                        | 0.00                              | 0.00                       | 0.00                        |



Table S5. Effect percentages for abnormal morphological characteristics evaluated in the zebrafish toxicity assay after exposure to doxorubicin (DOX).

| DOX           | Normal embryos <sup>a</sup> | Lethal embryos <sup>a</sup> | Teratogenic embryos <sup>a</sup> | Growth retardation <sup>b</sup> | Notochord <sup>b</sup> | Eyes <sup>b</sup> | Otoliths <sup>b</sup> | Somites <sup>b</sup> | Tail detachment <sup>b</sup> | Pericardial oedema <sup>b</sup> | Yolk oedema <sup>b</sup> | Heart beat <sup>b</sup> | Blood circulation <sup>b</sup> | Hatching <sup>b</sup> | Head <sup>c</sup> | Scoliosis <sup>c</sup> | Tail <sup>c</sup> |
|---------------|-----------------------------|-----------------------------|----------------------------------|---------------------------------|------------------------|-------------------|-----------------------|----------------------|------------------------------|---------------------------------|--------------------------|-------------------------|--------------------------------|-----------------------|-------------------|------------------------|-------------------|
| <b>24 hpf</b> |                             |                             |                                  |                                 |                        |                   |                       |                      |                              |                                 |                          |                         |                                |                       |                   |                        |                   |
| 50 µg/ml      | 74.0                        | 26.0                        | 0.0                              | 0.0                             | 0.0                    | 0.0               | 0.0                   | 0.0                  | 0.0                          | 0.0                             | 0.0                      |                         |                                |                       |                   |                        |                   |
| 5 µg/ml       | 74.7                        | 25.3                        | 0.0                              | 0.0                             | 0.0                    | 0.0               | 0.0                   | 0.0                  | 0.0                          | 0.0                             | 0.0                      |                         |                                |                       |                   |                        |                   |
| 2.5 µg/ml     | 77.1                        | 22.9                        | 0.0                              | 0.0                             | 0.0                    | 0.0               | 0.0                   | 0.0                  | 0.0                          | 0.0                             | 0.0                      |                         |                                |                       |                   |                        |                   |
| 1 µg/ml       | 81.3                        | 18.8                        | 0.0                              | 0.0                             | 0.0                    | 0.0               | 0.0                   | 0.0                  | 0.0                          | 0.0                             | 0.0                      |                         |                                |                       |                   |                        |                   |
| 0.5 µg/ml     | 87.5                        | 12.5                        | 0.0                              | 0.0                             | 0.0                    | 0.0               | 0.0                   | 0.0                  | 0.0                          | 0.0                             | 0.0                      |                         |                                |                       |                   |                        |                   |
| 0.1 µg/ml     | 87.5                        | 12.5                        | 0.0                              | 0.0                             | 0.0                    | 0.0               | 0.0                   | 0.0                  | 0.0                          | 0.0                             | 0.0                      |                         |                                |                       |                   |                        |                   |
| <b>48 hpf</b> |                             |                             |                                  |                                 |                        |                   |                       |                      |                              |                                 |                          |                         |                                |                       |                   |                        |                   |
| 50 µg/ml      | 0.0                         | 34.0                        | 66.0                             | 0.0                             | 69.7                   | 0.0               | 100.0                 | 0.0                  | 0.0                          | 100.0                           | 100.0                    | 100.0                   | 100.0                          | 6.1                   | 100.0             | 100.0                  | 100.0             |
| 5 µg/ml       | 70.7                        | 25.3                        | 4.0                              | 0.0                             | 0.0                    | 0.0               | 0.0                   | 0.0                  | 0.0                          | 1.8                             | 1.8                      | 1.8                     | 1.8                            | 50.9                  | 0.0               | 7.1                    | 3.6               |
| 2.5 µg/ml     | 77.1                        | 22.9                        | 0.0                              | 0.0                             | 0.0                    | 0.0               | 0.0                   | 0.0                  | 0.0                          | 0.0                             | 0.0                      | 0.0                     | 0.0                            | 78.4                  | 0.0               | 0.0                    | 0.0               |
| 1 µg/ml       | 81.3                        | 18.8                        | 0.0                              | 0.0                             | 0.0                    | 0.0               | 0.0                   | 0.0                  | 0.0                          | 0.0                             | 0.0                      | 0.0                     | 0.0                            | 64.1                  | 0.0               | 0.0                    | 0.0               |
| 0.5 µg/ml     | 87.5                        | 12.5                        | 0.0                              | 0.0                             | 0.0                    | 0.0               | 0.0                   | 0.0                  | 0.0                          | 0.0                             | 0.0                      | 0.0                     | 0.0                            | 38.1                  | 0.0               | 0.0                    | 0.0               |
| 0.1 µg/ml     | 87.5                        | 12.5                        | 0.0                              | 0.0                             | 0.0                    | 0.0               | 0.0                   | 0.0                  | 0.0                          | 0.0                             | 0.0                      | 0.0                     | 0.0                            | 28.6                  | 0.0               | 0.0                    | 0.0               |
| <b>72 hpf</b> |                             |                             |                                  |                                 |                        |                   |                       |                      |                              |                                 |                          |                         |                                |                       |                   |                        |                   |
| 50 µg/ml      | 0.0                         | 56.0                        | 44.0                             | 9.1                             | 100.0                  | 0.0               | 90.9                  | 0.0                  | 0.0                          | 100.0                           | 100.0                    | 100.0                   | 100.0                          | 81.8                  | 100.0             | 100.0                  | 100.0             |
| 5 µg/ml       | 68.0                        | 25.3                        | 6.7                              | 0.0                             | 3.6                    | 0.0               | 0.0                   | 0.0                  | 0.0                          | 5.5                             | 5.5                      | 5.5                     | 5.5                            | 98.2                  | 0.0               | 5.6                    | 0.0               |
| 2.5 µg/ml     | 75.0                        | 22.9                        | 2.1                              | 0.0                             | 2.7                    | 0.0               | 0.0                   | 0.0                  | 0.0                          | 2.7                             | 0.0                      | 0.0                     | 2.7                            | 100.0                 | 0.0               | 0.0                    | 0.0               |
| 1 µg/ml       | 81.3                        | 18.8                        | 0.0                              | 0.0                             | 0.0                    | 0.0               | 0.0                   | 0.0                  | 0.0                          | 0.0                             | 0.0                      | 0.0                     | 0.0                            | 100.0                 | 0.0               | 0.0                    | 0.0               |
| 0.5 µg/ml     | 87.5                        | 12.5                        | 0.0                              | 0.0                             | 0.0                    | 0.0               | 0.0                   | 0.0                  | 0.0                          | 0.0                             | 0.0                      | 0.0                     | 0.0                            | 100.0                 | 0.0               | 0.0                    | 0.0               |
| 0.1 µg/ml     | 87.5                        | 12.5                        | 0.0                              | 0.0                             | 0.0                    | 0.0               | 0.0                   | 0.0                  | 0.0                          | 0.0                             | 0.0                      | 0.0                     | 0.0                            | 100.0                 | 0.0               | 0.0                    | 0.0               |
| <b>96 hpf</b> |                             |                             |                                  |                                 |                        |                   |                       |                      |                              |                                 |                          |                         |                                |                       |                   |                        |                   |
| 50 µg/ml      | 0.0                         | 96.0                        | 4.0                              | 0.0                             | 100.0                  | 0.0               | 0.0                   | 0.0                  | 0.0                          | 100.0                           | 100.0                    | 100.0                   | 100.0                          | 100.0                 | 100.0             | 100.0                  | 100.0             |
| 5 µg/ml       | 69.3                        | 26.7                        | 4.0                              | 0.0                             | 1.8                    | 0.0               | 0.0                   | 0.0                  | 0.0                          | 1.8                             | 1.8                      | 1.8                     | 1.8                            | 100.0                 | 0.0               | 3.6                    | 0.0               |
| 2.5 µg/ml     | 75.0                        | 22.9                        | 2.1                              | 0.0                             | 2.7                    | 0.0               | 0.0                   | 0.0                  | 0.0                          | 2.7                             | 0.0                      | 0.0                     | 2.7                            | 100.0                 | 0.0               | 2.7                    | 0.0               |
| 1 µg/ml       | 81.3                        | 18.8                        | 0.0                              | 0.0                             | 0.0                    | 0.0               | 0.0                   | 0.0                  | 0.0                          | 0.0                             | 0.0                      | 0.0                     | 0.0                            | 100.0                 | 0.0               | 0.0                    | 0.0               |
| 0.5 µg/ml     | 87.5                        | 12.5                        | 0.0                              | 0.0                             | 0.0                    | 0.0               | 0.0                   | 0.0                  | 0.0                          | 0.0                             | 0.0                      | 0.0                     | 0.0                            | 100.0                 | 0.0               | 0.0                    | 0.0               |
| 0.1 µg/ml     | 87.5                        | 12.5                        | 0.0                              | 0.0                             | 0.0                    | 0.0               | 0.0                   | 0.0                  | 0.0                          | 0.0                             | 0.0                      | 0.0                     | 0.0                            | 100.0                 | 0.0               | 0.0                    | 0.0               |

Abreviation used: (hpf) hours post fertilisation.

<sup>a</sup> Percentage of mortality and teratogenicity based on all eggs.

<sup>b</sup> Percentage of teratogenic effect based on all alive embryos at the time of assessment.

<sup>c</sup> Percentage of teratogenic effect based on all hatched embryos at the time of assessment.

Table S6. Effect percentages for abnormal morphological characteristics evaluated in the zebrafish toxicity assay after exposure to a nanocomposite (FNP/DOX).

| FNP/DOX       | Normal embryos <sup>a</sup> | Lethal embryos <sup>a</sup> | Teratogenic embryos <sup>a</sup> | Growth retardation <sup>b</sup> | Notochord <sup>b</sup> | Eyes <sup>b</sup> | Otoliths <sup>b</sup> | Somites <sup>b</sup> | Tail detachment <sup>b</sup> | Pericardial oedema <sup>b</sup> | Yolk oedema <sup>b</sup> | Heart beat <sup>b</sup> | Blood circulation <sup>b</sup> | Hatching <sup>b</sup> | Head <sup>c</sup> | Scoliosis <sup>c</sup> | Tail <sup>c</sup> |
|---------------|-----------------------------|-----------------------------|----------------------------------|---------------------------------|------------------------|-------------------|-----------------------|----------------------|------------------------------|---------------------------------|--------------------------|-------------------------|--------------------------------|-----------------------|-------------------|------------------------|-------------------|
| <b>24 hpf</b> |                             |                             |                                  |                                 |                        |                   |                       |                      |                              |                                 |                          |                         |                                |                       |                   |                        |                   |
| 50 µg/ml      | 54.2                        | 27.1                        | 18.8                             | 0.0                             | 0.0                    | 0.0               | 17.1                  | 0.0                  | 0.0                          | 2.9                             | 5.7                      |                         |                                |                       |                   |                        |                   |
| 5 µg/ml       | 64.0                        | 32.0                        | 4.0                              | 0.0                             | 0.0                    | 0.0               | 0.0                   | 0.0                  | 0.0                          | 2.0                             | 0.0                      |                         |                                |                       |                   |                        |                   |
| 2.5 µg/ml     | 68.8                        | 31.3                        | 0.0                              | 0.0                             | 0.0                    | 0.0               | 0.0                   | 0.0                  | 0.0                          | 0.0                             | 0.0                      |                         |                                |                       |                   |                        |                   |
| 1 µg/ml       | 79.2                        | 20.8                        | 0.0                              | 0.0                             | 0.0                    | 0.0               | 0.0                   | 0.0                  | 0.0                          | 0.0                             | 0.0                      |                         |                                |                       |                   |                        |                   |
| 0.5 µg/ml     | 84.0                        | 16.0                        | 0.0                              | 0.0                             | 0.0                    | 0.0               | 0.0                   | 0.0                  | 0.0                          | 0.0                             | 0.0                      |                         |                                |                       |                   |                        |                   |
| 0.1 µg/ml     | 83.3                        | 16.7                        | 0.0                              | 0.0                             | 0.0                    | 0.0               | 0.0                   | 0.0                  | 0.0                          | 0.0                             | 0.0                      |                         |                                |                       |                   |                        |                   |
| <b>48 hpf</b> |                             |                             |                                  |                                 |                        |                   |                       |                      |                              |                                 |                          |                         |                                |                       |                   |                        |                   |
| 50 µg/ml      | 0.0                         | 31.3                        | 68.8                             | 0.0                             | 0.0                    | 0.0               | 18.2                  | 0.0                  | 0.0                          | 42.4                            | 36.4                     | 93.9                    | 42.4                           | 33.3                  | 0.0               | 45.5                   | 9.1               |
| 5 µg/ml       | 61.3                        | 32.0                        | 6.7                              | 0.0                             | 0.0                    | 0.0               | 0.0                   | 0.0                  | 0.0                          | 0.0                             | 0.0                      | 0.0                     | 0.0                            | 60.8                  | 0.0               | 3.2                    | 6.5               |
| 2.5 µg/ml     | 68.8                        | 31.3                        | 0.0                              | 0.0                             | 0.0                    | 0.0               | 0.0                   | 0.0                  | 0.0                          | 0.0                             | 0.0                      | 0.0                     | 0.0                            | 72.7                  | 0.0               | 0.0                    | 0.0               |
| 1 µg/ml       | 79.2                        | 20.8                        | 0.0                              | 0.0                             | 0.0                    | 0.0               | 0.0                   | 0.0                  | 0.0                          | 0.0                             | 0.0                      | 0.0                     | 0.0                            | 92.1                  | 0.0               | 0.0                    | 0.0               |
| 0.5 µg/ml     | 84.0                        | 16.0                        | 0.0                              | 0.0                             | 0.0                    | 0.0               | 0.0                   | 0.0                  | 0.0                          | 0.0                             | 0.0                      | 0.0                     | 0.0                            | 38.1                  | 0.0               | 0.0                    | 0.0               |
| 0.1 µg/ml     | 83.3                        | 16.7                        | 0.0                              | 0.0                             | 0.0                    | 0.0               | 0.0                   | 0.0                  | 0.0                          | 0.0                             | 0.0                      | 0.0                     | 0.0                            | 40.0                  | 0.0               | 0.0                    | 0.0               |
| <b>72 hpf</b> |                             |                             |                                  |                                 |                        |                   |                       |                      |                              |                                 |                          |                         |                                |                       |                   |                        |                   |
| 50 µg/ml      | 0.0                         | 33.3                        | 66.7                             | 0.0                             | 100.0                  | 0.0               | 78.1                  | 0.0                  | 0.0                          | 93.8                            | 93.8                     | 93.8                    | 100.0                          | 93.8                  | 36.7              | 36.7                   | 36.7              |
| 5 µg/ml       | 60.0                        | 33.3                        | 6.7                              | 0.0                             | 2.0                    | 0.0               | 0.0                   | 0.0                  | 0.0                          | 4.0                             | 4.0                      | 4.0                     | 4.0                            | 94.0                  | 2.1               | 4.3                    | 2.1               |
| 2.5 µg/ml     | 68.8                        | 31.3                        | 0.0                              | 0.0                             | 0.0                    | 0.0               | 0.0                   | 0.0                  | 0.0                          | 0.0                             | 0.0                      | 0.0                     | 0.0                            | 100.0                 | 0.0               | 3.0                    | 3.0               |
| 1 µg/ml       | 79.2                        | 20.8                        | 0.0                              | 0.0                             | 0.0                    | 0.0               | 0.0                   | 0.0                  | 0.0                          | 0.0                             | 0.0                      | 0.0                     | 0.0                            | 97.4                  | 0.0               | 0.0                    | 0.0               |
| 0.5 µg/ml     | 84.0                        | 16.0                        | 0.0                              | 0.0                             | 0.0                    | 0.0               | 0.0                   | 0.0                  | 0.0                          | 0.0                             | 0.0                      | 0.0                     | 0.0                            | 100.0                 | 0.0               | 0.0                    | 0.0               |
| 0.1 µg/ml     | 83.3                        | 16.7                        | 0.0                              | 0.0                             | 0.0                    | 0.0               | 0.0                   | 0.0                  | 0.0                          | 0.0                             | 0.0                      | 0.0                     | 0.0                            | 100.0                 | 0.0               | 0.0                    | 0.0               |
| <b>96 hpf</b> |                             |                             |                                  |                                 |                        |                   |                       |                      |                              |                                 |                          |                         |                                |                       |                   |                        |                   |
| 50 µg/ml      | 0.0                         | 68.8                        | 31.3                             | 0.0                             | 86.7                   | 0.0               | 86.7                  | 0.0                  | 0.0                          | 93.3                            | 93.3                     | 86.7                    | 93.3                           | 93.3                  | 100.0             | 85.7                   | 78.6              |
| 5 µg/ml       | 53.3                        | 34.7                        | 12.0                             | 0.0                             | 4.1                    | 0.0               | 0.0                   | 0.0                  | 0.0                          | 4.1                             | 6.1                      | 0.0                     | 4.1                            | 98.0                  | 4.2               | 14.6                   | 2.1               |
| 2.5 µg/ml     | 66.7                        | 31.3                        | 2.1                              | 0.0                             | 0.0                    | 0.0               | 0.0                   | 0.0                  | 0.0                          | 0.0                             | 0.0                      | 0.0                     | 0.0                            | 100.0                 | 0.0               | 3.0                    | 3.0               |
| 1 µg/ml       | 79.2                        | 20.8                        | 0.0                              | 0.0                             | 0.0                    | 0.0               | 0.0                   | 0.0                  | 0.0                          | 0.0                             | 0.0                      | 0.0                     | 0.0                            | 97.4                  | 0.0               | 0.0                    | 0.0               |
| 0.5 µg/ml     | 84.0                        | 16.0                        | 0.0                              | 0.0                             | 0.0                    | 0.0               | 0.0                   | 0.0                  | 0.0                          | 0.0                             | 0.0                      | 0.0                     | 0.0                            | 100.0                 | 0.0               | 0.0                    | 0.0               |
| 0.1 µg/ml     | 83.3                        | 16.7                        | 0.0                              | 0.0                             | 0.0                    | 0.0               | 0.0                   | 0.0                  | 0.0                          | 0.0                             | 0.0                      | 0.0                     | 0.0                            | 100.0                 | 0.0               | 0.0                    | 0.0               |

Abbreviation used: (hpf) hours post fertilisation.

<sup>a</sup> Percentage of mortality and teratogenicity based on all eggs.

<sup>b</sup> Percentage of teratogenic effect based on all alive embryos at the time of assessment.

<sup>c</sup> Percentage of teratogenic effect based on all hatched embryos at the time of assessment.
